# Supplementary material for: Minutes-duration optical flares with supernova luminosities
Source: Springer Nature journal article supplement (doi:10.1038/s41586-023-06673-6), 2023-11-15
Supplement: MOESM1 [file 41586_2023_6673_MOESM1_ESM.pdf]

---

**Supplementary information**

---

**Minutes-duration optical flares with  
supernova luminosities**

---

In the format provided by the  
authors and unedited



| Object                          | Band              | $L_{\text{flare}}$ (erg s <sup>-1</sup> ) | Amp.                 | Duration          | Persistence     |
|---------------------------------|-------------------|-------------------------------------------|----------------------|-------------------|-----------------|
| <i>Unknown</i>                  |                   |                                           |                      |                   |                 |
| AT2022tsd (this paper)          | 500 nm            | $10^{43}$ – $10^{44}$                     | $\gtrsim 100\times$  | 10–80 min         | $\gtrsim 100$ d |
| GRB 070610 (BH? NS?)            | 800 nm            | $10^{35}?$                                | $\gtrsim 100\times$  | 10 s–mins         | 5 d             |
| NGC 1313 X-2 (ULX)              | 0.3–10 keV        | $10^{40}$                                 | $\sim 10\times$      | 10 min            | –               |
| <i>Neutron Stars</i>            |                   |                                           |                      |                   |                 |
| SGR in M81/M82 (GF Spike)       | 20 keV–10 MeV     | $1.8 \times 10^{47}$                      | $\sim 10^{11}\times$ | 0.5 s             | –               |
| SGR 1806-20 (GF Tail)           | 20 keV–10 MeV     | $1.3 \times 10^{42}$                      | $\sim 10^7\times$    | 8 min             | –               |
| Crab (nanoshot)                 | 8 GHz             | $10^{34}$                                 | $> 1000\times$       | 2 ns              | –               |
| <i>Stellar-mass black holes</i> |                   |                                           |                      |                   |                 |
| GRS 1915+105 (XRB)              | $2.2 \mu\text{m}$ | $\gtrsim 10^{36}$                         | $\lesssim 10\times$  | 10 min            | –               |
| GRB 080319B (GRB)               | 500 nm            | $10^{50}$                                 | $> 10\times$         | 40 s              | 60 s            |
| <i>Supermassive black holes</i> |                   |                                           |                      |                   |                 |
| AT2019ehz (TDE)                 | 0.3–10 keV        | $10^{44}$                                 | $> 10\times$         | 10 d              | 70 d            |
| Sagittarius A*                  | $2.1 \mu\text{m}$ | $10^{34}$                                 | $\lesssim 10\times$  | 30 min            | –               |
| M87                             | 350 GeV           | $10^{42}$                                 | $\gtrsim 10\times$   | Few days          | –               |
| S5 1803+784 (blazar)            | 600 nm            | $10^{46}$                                 | $10\times$           | $\gtrsim 1$ month | –               |
| GSN 069 (QPE)                   | 0.4–1 keV         | $10^{43}$                                 | $\gtrsim 10\times$   | 1 hr              | –               |
| ASASSN-14ko (TDE?)              | 200–500 nm        | $10^{43}$ – $10^{44}$                     | $> 10\times$         | 10 d              | –               |

Table Supplementary Information Table 1: **Summary of large-amplitude ( $\gtrsim 10\times$ ) flares from representative literature objects.** See Methods section 14 for additional details and data sources.

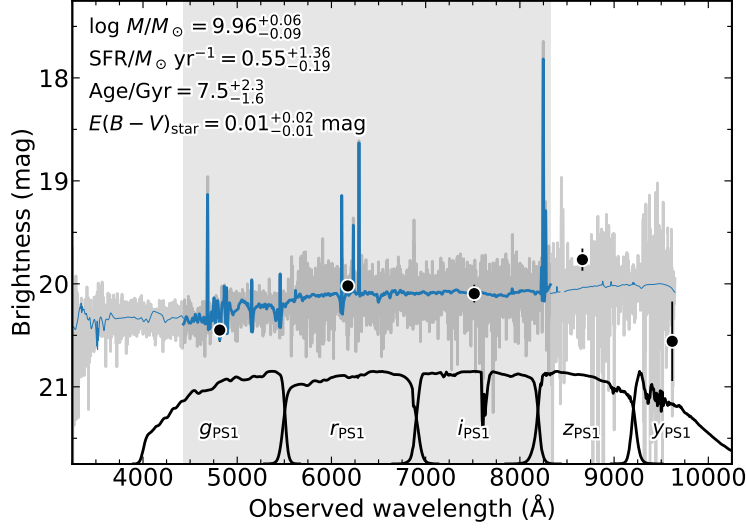

Supplementary Information Figure 1: **Best-fit host-galaxy properties of AT2022tsd.** The observed host-galaxy photometry is shown as black data points, the observed host-galaxy spectrum is shown in grey, and the best-fit model is shown in blue. The shaded region indicates the region of the spectrum used in the `prospector` fit.

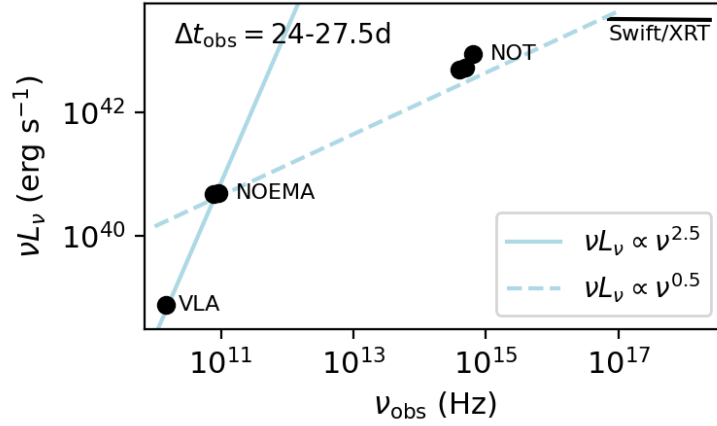

Supplementary Information Figure 2: **SED of AT2022tsd at  $\Delta t_{\text{obs}} \approx 25$  d post-discovery.** X-ray data are shown with a photon index of  $\Gamma = 2.01$  across the *Swift*/XRT 0.3–10 keV bandpass. Lines mark power laws connecting the radio to submillimeter data (solid), and the millimeter to X-ray data (dashed).

Table Supplementary Information Table 2: **Host-galaxy photometry for AT2022tsd, not corrected for Milky Way extinction.** Error bars are  $1\sigma$  confidence intervals.

| Survey    | Filter | Brightness (AB mag) |
|-----------|--------|---------------------|
| PanSTARRS | $g$    | $21.32 \pm 0.10$    |
| PanSTARRS | $r$    | $20.59 \pm 0.07$    |
| PanSTARRS | $i$    | $20.67 \pm 0.05$    |
| PanSTARRS | $z$    | $20.87 \pm 0.36$    |
| PanSTARRS | $y$    | $20.14 \pm 0.10$    |

| $t$<br>(UT)      | $\Delta t$<br>(days) | $t_{\text{exp}}$<br>(ks) | Count Rate<br>( $10^{-3} \text{ s}^{-1}$ ) | $F_X$<br>( $10^{-14} \text{ erg s}^{-1} \text{ cm}^{-2}$ ) | $L_X$<br>( $10^{43} \text{ erg s}^{-1}$ ) |
|------------------|----------------------|--------------------------|--------------------------------------------|------------------------------------------------------------|-------------------------------------------|
| 2022-10-04 09:17 | $22.65 \pm 0.24$     | 3.64                     | $10.43 \pm 2.06$                           | $53.17 \pm 10.50$                                          | $11.43 \pm 2.26$                          |
| 2022-10-06 14:55 | $24.41 \pm 0.22$     | 3.78                     | $9.06 \pm 1.85$                            | $46.19 \pm 9.44$                                           | $9.93 \pm 2.03$                           |
| 2022-10-08 02:17 | $25.65 \pm 0.29$     | 2.47                     | $8.46 \pm 2.24$                            | $43.14 \pm 11.43$                                          | $9.28 \pm 2.46$                           |
| 2022-10-09 05:06 | $26.54 \pm 0.29$     | 2.29                     | $10.92 \pm 2.91$                           | $55.67 \pm 14.84$                                          | $11.97 \pm 3.19$                          |
| 2022-10-10 09:47 | $27.31 \pm 0.11$     | 2.37                     | $5.07 \pm 2.60$                            | $25.85 \pm 13.26$                                          | $5.56 \pm 2.85$                           |
| 2022-10-21 16:35 | $36.60 \pm 0.42$     | 1.44                     | $< 11.89$                                  | $< 60.63$                                                  | $< 13.04$                                 |
| 2022-10-24 09:25 | $38.57 \pm 0.24$     | 1.04                     | $< 13.97$                                  | $< 71.27$                                                  | $< 15.32$                                 |
| 2022-10-26 01:27 | $40.03 \pm 0.37$     | 2.77                     | $5.35 \pm 1.88$                            | $27.30 \pm 9.56$                                           | $5.87 \pm 2.06$                           |
| 2022-11-06 01:21 | $48.65 \pm 0.24$     | 4.39                     | $1.86 \pm 0.99$                            | $9.50 \pm 5.04$                                            | $2.04 \pm 1.08$                           |
| 2022-11-16 01:40 | $56.48 \pm 0.11$     | 1.87                     | $2.02 \pm 1.57$                            | $10.29 \pm 8.01$                                           | $2.21 \pm 1.72$                           |
| 2022-11-17 07:44 | $57.61 \pm 0.24$     | 1.96                     | $3.60 \pm 1.99$                            | $18.38 \pm 10.16$                                          | $3.95 \pm 2.18$                           |
| 2022-12-01 02:23 | $68.65 \pm 0.32$     | 5.75                     | $1.28 \pm 0.78$                            | $6.54 \pm 3.99$                                            | $1.41 \pm 0.86$                           |
| 2022-12-15 00:09 | $79.78 \pm 0.38$     | 2.97                     | $< 3.99$                                   | $< 20.33$                                                  | $< 4.37$                                  |
| 2022-12-16 09:52 | $81.10 \pm 0.58$     | 2.67                     | $< 4.50$                                   | $< 22.97$                                                  | $< 4.94$                                  |

Table Supplementary Information Table 3: **Swift XRT (0.3–10 keV) observations of AT2022tsd.**

The table includes epochs  $\Delta t$  since discovery in the rest frame, exposure time  $t_{\text{exp}}$ , flux  $F_X$ , and luminosity  $L_X$ . Error bars are  $1\sigma$  and upper limits are given as  $3\sigma$ .

| $t_{\text{start}}$<br>(UT) | $\Delta t$<br>(days) | $t_{\text{exp}}$<br>(ks) | $F_X$<br>( $10^{-14} \text{ erg s}^{-1} \text{ cm}^{-2}$ ) | $L_X$<br>( $10^{43} \text{ erg s}^{-1}$ ) |
|----------------------------|----------------------|--------------------------|------------------------------------------------------------|-------------------------------------------|
| 2022-10-16 23:14           | 32.42                | 20                       | $14.60^{+3.33}_{-3.22}$                                    | $3.14^{+0.72}_{-0.69}$                    |
| 2022-10-27 21:54           | 41.13                | 20                       | $10.46^{+2.78}_{-2.22}$                                    | $2.25^{+0.60}_{-0.48}$                    |
| 2022-11-04 12:33           | 47.19                | 20                       | $7.59^{+2.64}_{-2.40}$                                     | $1.63^{+0.57}_{-0.52}$                    |
| 2022-11-22 05:26           | 61.27                | 20                       | $9.17^{+3.14}_{-2.53}$                                     | $1.97^{+0.68}_{-0.54}$                    |
| 2022-12-26 14:11           | 88.62                | 24                       | $1.68^{+2.03}_{-0.92}$                                     | $0.36^{+0.44}_{-0.20}$                    |
| 2022-12-29 07:06           | 90.77                | 16                       | $2.48^{+4.98}_{-1.57}$                                     | $0.53^{+1.07}_{-0.34}$                    |
| 2023-01-30 16:28           | 116.55               | 40                       | $0.96^{+1.04}_{-0.51}$                                     | $0.21^{+0.22}_{-0.11}$                    |
| 2023-07-11 03:37           | 244.09               | 16                       | $0.66^{+0.54}_{-0.43}$                                     | $0.14^{+0.12}_{-0.09}$                    |
| 2023-07-11 to 2023-07-16   | 244–248              | 40                       | $0.38^{+0.15}_{-0.12}$                                     | $0.08^{+0.03}_{-0.03}$                    |

Table Supplementary Information Table 4: *Chandra X-ray Observatory 0.5–6 keV observations of AT2022tsd*. The table includes epochs  $\Delta t$  since discovery in the rest frame, exposure time  $t_{\text{exp}}$ , flux  $F_X$ , and luminosity  $L_X$ . Error bars are  $1\sigma$  confidence intervals. The final row shows the stacked measurement from three observations conducted on three different days.

Table Supplementary Information Table 5: **Radio observations of AT2022tsd.** Table includes epochs since discovery  $\Delta t$  in the rest frame, observed frequency  $\nu_{\text{obs}}$ , flux density  $f_\nu$  of the source (if detected), and root-mean-square (RMS) of a region close to the source in the image.

| Start Date<br>(UT)  | $\Delta t$<br>(days) | $\nu_{\text{obs}}$<br>(GHz) | $f_\nu$<br>(mJy) | RMS<br>(mJy) | Telescope |
|---------------------|----------------------|-----------------------------|------------------|--------------|-----------|
| 2022-10-02 06:50:00 | 19.75                | 15.00                       | 0.023            | 0.004        | VLA       |
| 2022-10-04 07:20:00 | 21.36                | 230.00                      | –                | 0.270        | SMA       |
| 2022-10-04 22:07:00 | 21.85                | 77.26                       | 0.283            | 0.075        | NOEMA     |
| 2022-10-04 22:07:00 | 21.85                | 92.74                       | 0.245            | 0.065        | NOEMA     |
| 2022-10-10 08:02:00 | 26.16                | 45.00                       | 0.127            | 0.033        | VLA       |
| 2022-10-10 08:02:00 | 26.16                | 22.00                       | 0.038            | 0.009        | VLA       |
| 2022-10-10 08:02:00 | 26.16                | 15.00                       | 0.031            | 0.004        | VLA       |
| 2022-10-10 08:02:00 | 26.16                | 33.00                       | 0.086            | 0.013        | VLA       |
| 2022-10-10 21:16:00 | 26.59                | 134.76                      | 0.212            | 0.047        | NOEMA     |
| 2022-10-10 21:16:00 | 26.59                | 150.24                      | 0.232            | 0.057        | NOEMA     |
| 2022-10-11 00:45:00 | 26.71                | 77.26                       | 0.239            | 0.035        | NOEMA     |
| 2022-10-11 00:45:00 | 26.71                | 92.74                       | 0.284            | 0.032        | NOEMA     |
| 2022-10-11 02:53:00 | 26.78                | 207.26                      | 0.574            | 0.114        | NOEMA     |
| 2022-10-11 02:53:00 | 26.78                | 222.74                      | 0.551            | 0.117        | NOEMA     |
| 2022-10-12 02:50:00 | 27.57                | 77.26                       | 0.298            | 0.082        | NOEMA     |
| 2022-10-12 02:50:00 | 27.57                | 92.74                       | 0.316            | 0.078        | NOEMA     |
| 2022-10-13 23:24:00 | 29.05                | 77.26                       | 0.170            | 0.039        | NOEMA     |
| 2022-10-13 23:24:00 | 29.05                | 92.74                       | 0.179            | 0.037        | NOEMA     |
| 2022-10-14 02:04:00 | 29.14                | 134.76                      | 0.277            | 0.087        | NOEMA     |
| 2022-10-14 02:04:00 | 29.14                | 150.24                      | 0.411            | 0.117        | NOEMA     |
| 2022-10-19 04:29:00 | 33.20                | 350.50                      | 0.313            | 0.027        | ALMA      |
| 2022-10-20 05:44:00 | 34.04                | 15.00                       | 0.033            | 0.004        | VLA       |
| 2022-10-20 05:44:00 | 34.04                | 33.00                       | 0.071            | 0.010        | VLA       |
| 2022-10-20 05:44:00 | 34.04                | 22.00                       | 0.056            | 0.007        | VLA       |
| 2022-10-20 05:44:00 | 34.04                | 10.00                       | 0.031            | 0.004        | VLA       |
| 2022-10-20 05:44:00 | 34.04                | 45.00                       | 0.075            | 0.021        | VLA       |
| 2022-10-21 04:54:40 | 34.81                | 412.00                      | 0.259            | 0.038        | ALMA      |

|                     |        |        |       |       |       |
|---------------------|--------|--------|-------|-------|-------|
| 2022-10-22 03:52:39 | 35.57  | 242.00 | 0.300 | 0.028 | ALMA  |
| 2022-10-28 00:54:00 | 40.25  | 77.26  | 0.363 | 0.113 | NOEMA |
| 2022-10-28 00:54:00 | 40.25  | 92.74  | 0.299 | 0.093 | NOEMA |
| 2022-10-28 00:54:00 | 40.25  | 150.24 | 0.328 | 0.037 | NOEMA |
| 2022-10-29 23:00:00 | 41.77  | 150.24 | 0.330 | 0.040 | NOEMA |
| 2022-10-29 23:00:00 | 41.77  | 134.76 | 0.228 | 0.028 | NOEMA |
| 2022-11-01 23:03:00 | 44.16  | 222.74 | 0.198 | 0.052 | NOEMA |
| 2022-11-01 23:03:00 | 44.16  | 207.26 | 0.175 | 0.048 | NOEMA |
| 2022-11-08 04:52:00 | 49.13  | 15.00  | 0.031 | 0.004 | VLA   |
| 2022-11-08 04:52:00 | 49.13  | 22.00  | 0.043 | 0.006 | VLA   |
| 2022-11-08 04:52:00 | 49.13  | 33.00  | 0.075 | 0.008 | VLA   |
| 2022-11-08 04:52:00 | 49.13  | 45.00  | 0.120 | 0.015 | VLA   |
| 2022-11-18 20:08:00 | 57.60  | 77.26  | 0.252 | 0.039 | NOEMA |
| 2022-11-18 20:08:00 | 57.60  | 92.74  | 0.304 | 0.030 | NOEMA |
| 2022-11-26 22:16:00 | 64.04  | 134.76 | 0.111 | 0.030 | NOEMA |
| 2022-11-26 22:16:00 | 64.04  | 150.24 | 0.119 | 0.032 | NOEMA |
| 2022-12-03 03:26:00 | 68.98  | 22.00  | 0.078 | 0.007 | VLA   |
| 2022-12-03 03:26:00 | 68.98  | 33.00  | 0.099 | 0.009 | VLA   |
| 2022-12-03 03:26:00 | 68.98  | 45.00  | 0.108 | 0.018 | VLA   |
| 2022-12-03 03:26:00 | 68.98  | 15.00  | 0.049 | 0.004 | VLA   |
| 2022-12-14 18:56:00 | 78.25  | 77.25  | 0.131 | 0.028 | NOEMA |
| 2022-12-14 18:56:00 | 78.25  | 92.74  | 0.153 | 0.024 | NOEMA |
| 2023-01-27 01:26:00 | 112.69 | 45.00  | –     | 0.016 | VLA   |
| 2023-01-27 01:26:00 | 112.69 | 33.00  | 0.052 | 0.011 | VLA   |
| 2023-01-27 01:26:00 | 112.69 | 15.00  | 0.048 | 0.003 | VLA   |
| 2023-01-27 01:26:00 | 112.69 | 22.00  | 0.048 | 0.006 | VLA   |
| 2023-03-04 12:14    | 141.70 | 1.27   | 0.140 | 0.033 | uGMRT |
| 2023-03-05 12:14    | 142.50 | 0.65   | –     | 0.195 | uGMRT |
| 2023-03-06 10:19    | 143.23 | 0.44   | –     | 0.810 | uGMRT |
| 2023-03-23 13:19:00 | 156.86 | 77.25  | –     | 0.045 | NOEMA |
| 2023-03-23 13:19:00 | 156.86 | 92.74  | –     | 0.047 | NOEMA |
| 2023-03-31 08:10    | 163.06 | 1.37   | 0.131 | 0.035 | uGMRT |
| 2023-04-01 10:05    | 163.92 | 0.65   | –     | 0.165 | uGMRT |



|                     |        |       |       |       |       |
|---------------------|--------|-------|-------|-------|-------|
| 2023-04-02 10:05    | 164.71 | 0.43  | –     | 0.465 | uGMRT |
| 2023-04-05 23:00:00 | 167.53 | 6.00  | –     | 0.009 | VLA   |
| 2023-04-05 23:00:00 | 167.53 | 10.00 | 0.038 | 0.009 | VLA   |
| 2023-04-05 23:00:00 | 167.53 | 22.00 | –     | 0.009 | VLA   |
| 2023-04-05 23:00:00 | 167.53 | 3.00  | –     | 0.018 | VLA   |

---
